# Supplementary material
Source: publisher figshare collection journal article supplement (https://acs.figshare.com/ndownloader/files/3741757)
Supplement: Supplementary file 1 [file 3741757]

*Environmental Science & Technology*

## **Supporting Information**

Macroscopic and spectroscopic assessment of the co-sorption of  
Fe(II) with As(III) and As(V) on Al-oxide

*Ying Zhu and Evert J. Elzinga*

Department of Earth & Environmental Sciences, Rutgers University, Newark, NJ, USA

**12 pages, 9 Figures, 2 Tables**

## 1. EXAFS data analyses of the sorption samples and reference compounds

EXAFS data fitting of the spectra was done on Fourier transformed  $k^3$  weighed  $\chi$  spectra in R-space using WinXAS 3.1<sup>1</sup>. Theoretical backscattering paths of Fe-O, Fe-Fe and Fe-Al were calculated with the FEFF 7.0 code<sup>2</sup>, based on the structure of nikischerite (a Fe(II)-Al(III)-LDH with chemical formula  $\text{NaFe}^{\text{II}}_6\text{Al}_3(\text{SO}_4)_2(\text{OH})_{18}(\text{H}_2\text{O})_{12}$ , characterized in reference [3]), whereas Fe-As, As-O, As-Fe single scattering and three multiple scattering (MS) within the As(V) centered tetrahedron was calculated based on the structure of scorodite ( $\text{Fe(III)As(V)O}_4 \cdot 2\text{H}_2\text{O}$ , characterized in reference [4]). Theoretical As-Al scattering paths were obtained by replacing Fe with Al in octahedral positions of scorodite. The amplitude reduction factor was set at 0.9 for the Fe fits, and at 1.0 for the As fits. A single  $E_0$  shift value was allowed to vary during optimization.

The Fe *K*-edge EXAFS data of samples containing Fe(II)-Al(III)-LDH were fitted with three paths: first-shell Fe-O, and second-shell Fe-Fe and Fe-Al, based on the crystal structure of nikischerite.<sup>3</sup> In this structure, Fe(II) is surrounded by six first-shell O atoms, and three Fe and three Al second-shell neighbors that are located at the same radial distance (Figure S1). To reduce the number of free parameters, the radial distances and Debye-Waller factors ( $\sigma^2$ ) of second-shell Fe-Fe and Fe-Al were constrained to be the same, while all other factors were allowed to vary. For the aqueous Fe(II) reference and the dual-sorbate samples containing 0.5 mM As(V), only first-shell Fe-O was fitted due to the lack of apparent second-neighbor backscattering as observed in the RSFs (Figure 3 of the main manuscript). The spectrum of the Fe(II)-As(V) precipitate was fitted with first-shell Fe-O and second-shell Fe-Fe and Fe-As paths.

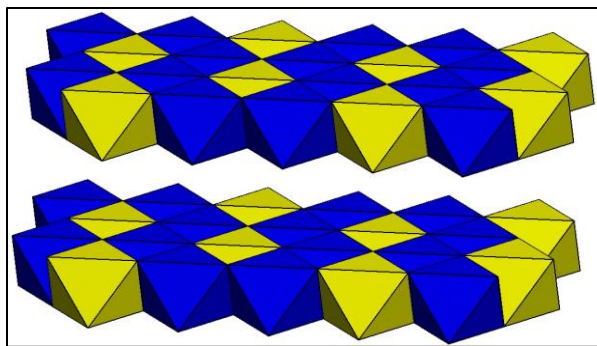

**Figure S1:** The structure of nikischerite, a Fe(II)-Al(III)-LDH mineral with chemical formula  $\text{NaFe}^{\text{II}}_6\text{Al}_3(\text{SO}_4)_2(\text{OH})_{18}(\text{H}_2\text{O})_{12}$ . Blue and yellow octahedra represent Fe(II) and Al(III) cations in octahedral coordination with hydroxyl groups respectively. The octahedral layers have a positive structural charge, which is balanced by sulfate anions in the interlayer (not shown).

The As *K*-edge EXAFS data of all the sorption samples were fitted with first-shell O backscatters and second-shell Al backscatters. For As(V) sorption samples in both binary and ternary systems, three fully restrained MS paths within the As(V) centered tetrahedron were also employed in the fitting, in addition to As-O and As-Al paths alone (results not shown), following the MS fitting scheme of Mikutta et al.<sup>5</sup> and Voegelin et al.<sup>6</sup> The inclusion of MS slightly improved the fitting quality without inducing substantial changes in the major parameters of As-O and As-Al distances, which agrees with the findings of Voegelin et al.<sup>6</sup> Because of the minor impacts of MS on our fitting results and data interpretation, only the single-shell fits are presented in Table S1, consistent with other studies (e.g. reference [7]). For the As data of the ternary sorption samples, we also tested data fits assuming As-Fe instead of As-Al second-neighbor scattering. This yielded distinctly worse fit quality relative to fits with second-neighbor As-Al scattering, regardless of the inclusion of MS paths. This confirms our interpretation of As being present as adsorption complexes at the Al-oxide surface in both the presence and absence of Fe(II), as discussed in the main manuscript. For the aqueous arsenite and arsenate references,

only first-shell O was fitted, while for the reference Fe(II)-As(V) precipitate, first-shell As-O and second-shell As-Fe paths were fitted (Table S2).

Error estimates of the optimized XAS fitting parameters are  $\pm 0.02$  Å for the radial distance (R) of the first coordination shells, and  $\pm 0.04$  Å for the radial distances of longer shells. For coordination numbers (CN), which are correlated to the Debye-Waller factor, the estimated error is  $\pm 25$  %. These error estimates of the fitting parameters are based on fits of reference compounds and estimates provided in previous relevant XAS studies.<sup>7-11</sup>

## **2. Comparison of structural information of symplectite and EXAFS fit results of the Fe(II)-As(V) reference precipitate**

Figure S2 shows the mineralogical structure of symplectite ( $\text{Fe}_3(\text{AsO}_4)_2 \cdot 8\text{H}_2\text{O}$ ), which is crystallographically similar to vivianite ( $\text{Fe}_3(\text{PO}_4)_2 \cdot 8\text{H}_2\text{O}$ ),<sup>12</sup> reflecting the chemical similarity of arsenate and phosphate. The structure of symplectite contains single  $\text{Fe}^{\text{II}}\text{O}_6$  octahedra and pairs of edge sharing Fe(II) octahedra (double Fe(II) octahedra), which are linked by arsenate groups (Figure S2). The structural arrangement of Fe(II) and As(V) is further resolved in Figure S3. Based on experimental distance of Fe-O (2.10-2.14 Å) and As-O (1.68-1.69 Å), and Fe-O-As angles provided in Figure S3, theoretical bond distance of Fe-As was estimated to be 3.43-3.56 Å.

Our EXAFS data fitting results (Table S1) of the Fe(II)-As(V) precipitate indicate that it is structurally similar to symplectite. The Fe *K*-edge EXAFS fitting results of Fe(II)-As(V)-precipitate (Table S1), the first shell is fitted with 5.3 O atoms at a radial distance of 2.11 Å, in agreement with an octahedral arrangement of O atoms around central Fe(II). The second-shell  $R_{\text{Fe-Fe}}=3.25$  Å is very close to the Fe-Fe distance (3.26 Å) in  $\text{Fe}(\text{OH})_2$ ,<sup>13</sup> consistent with the edge-sharing octahedron configuration for double Fe(II) groups present in symplectite (Figure S2 and

S3b, S3c). In addition, the average  $R_{\text{Fe-As}}=3.45 \text{ \AA}$  is within the range of estimated Fe-As distance in symplecite, as shown above. The As *K*-edge EXAFS fitting results show first-shell  $\text{CN}_{\text{As-O}}=3.3(\pm 30\%)$  for Fe(II)-As(V) precipitate at an average distance of  $R = 1.68 \text{ \AA}$ , suggesting that As(V) is coordinated by O atoms in tetrahedral configuration<sup>7, 14-16</sup>. The second-shell  $R_{\text{As-Fe}} = 3.41 \text{ \AA}$  is consistent with the average  $R_{\text{Fe-As}}$  obtained from Fe *K*-edge EXAFS results, given the large error of  $\pm 0.04 \text{ \AA}$  correlated with *R* values of second-shell fitting. This result is also within the range of As-Fe distance of 3.31-3.55  $\text{\AA}$  reported in Jönsson and Sherman (2008).<sup>17</sup>

Although the EXAFS fitting results demonstrate reasonable similarity between the structure of the Fe(II)-As(V) bulk precipitate and symplecite, XRD analysis showed the material to be amorphous precluding confirmation of phase identity and purity.

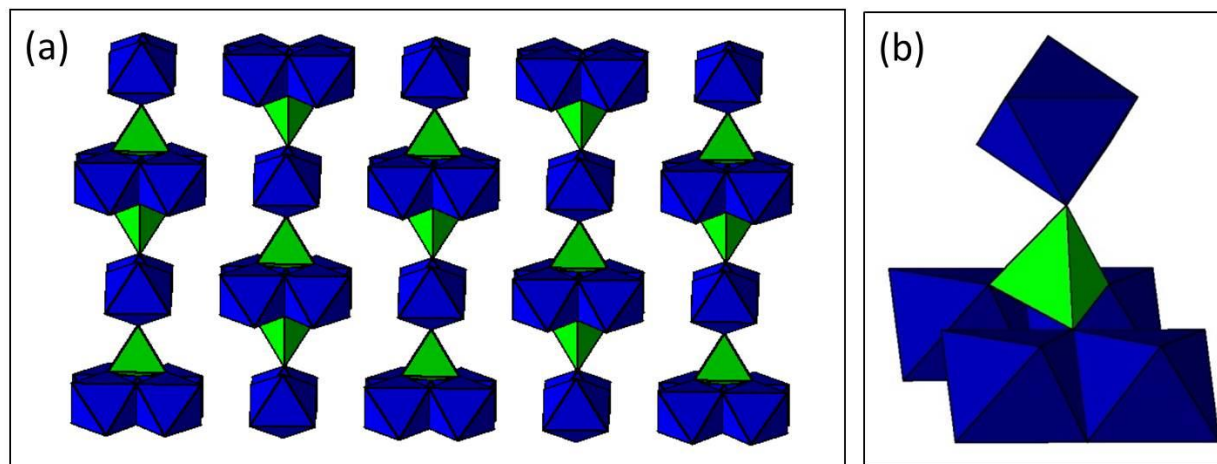

Figure S2: (a) Structure of symplecite ( $\text{Fe}_3(\text{AsO}_4)_2 \cdot 8\text{H}_2\text{O}$ );<sup>12</sup> (b) arsenate tetrahedron coordinated with 1 single Fe(II) octahedron and 2 pairs of double Fe(II) octahedra. Blue octahedra and green tetrahedra represent octahedral Fe(II) and tetrahedral As(V), respectively.

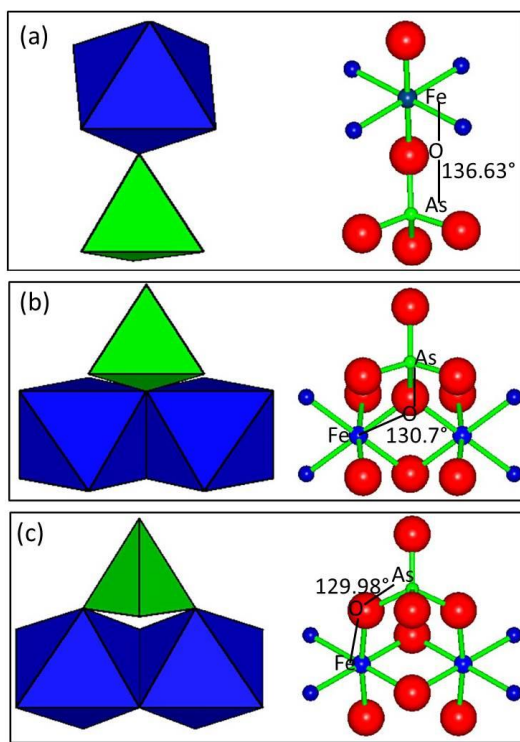

**Figure S3:** Arrangement of As(V) and Fe(II) within the symplectite structure presented by polyhedra (left) and atomic spheres (right): (a) As(V) tetrahedron coordinated with a single Fe(II) octahedron; (b)(c) As tetrahedron link with a double Fe(II) octahedral unit. Red, green, big blue and small blue atomic spheres in the right represent oxygen, As, Fe and water, respectively. Fe-O-As angles<sup>12</sup> used for distance calculation are indicated in each figure.

### 3. As *K*-edge EXAFS data of sorption samples and As reference compounds

Figures S4- S7 present the entire set of As *K*-edge EXAFS data collected for this study; the fit results are presented in Table S2. The first peak in the RSFs represents the first-shell O atoms surrounding central As(V) and As(III). The second shells visible in the RSFs of the sorption samples represent second-shell Al neighbors in the coordination sphere of sorbed As(III) and As(V), consistent with inner-sphere coordination of both arsenic species at the Al-oxide surface.

The spectral comparison presented in Figure S8 illustrates that the dominant As(V) sorption mechanism on  $\gamma$ -Al<sub>2</sub>O<sub>3</sub> remains the same, irrespective of the initial As(V) concentrations. The comparison displayed in Figure S9 shows the similarity of the speciation of As(III) and As(V) in single- and dual-sorbate systems. This demonstrates that Fe(II) has no noticeable impact on the mode of As retention in our experimental systems, with both As(III) and As(V) coordinated predominantly as bidentate binuclear adsorption complexes at the surface of the Al-oxide sorbent in both the presence and absence of Fe(II).

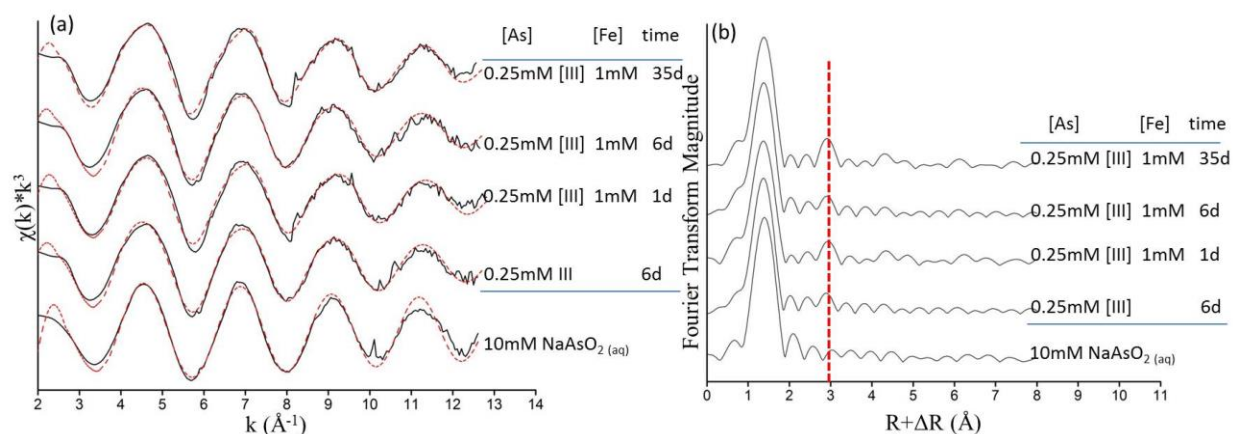

**Figure S4:** As  $K$ -edge EXAFS spectra of aqueous As(III) and As(III)/ $\gamma$ -Al<sub>2</sub>O<sub>3</sub> sorption samples in single-sorbate reaction and dual-sorbate reactions with 1mM Fe(II) addition: (a)  $k^3$ -weighted  $\chi$  spectra and (b) corresponding radial structure functions (RSFs). Solid and red dotted lines in panel (a) represent raw and fitted spectra, respectively. The red vertical dashed line in panel (b) locates the second-shell Al neighbors in the sorption samples.

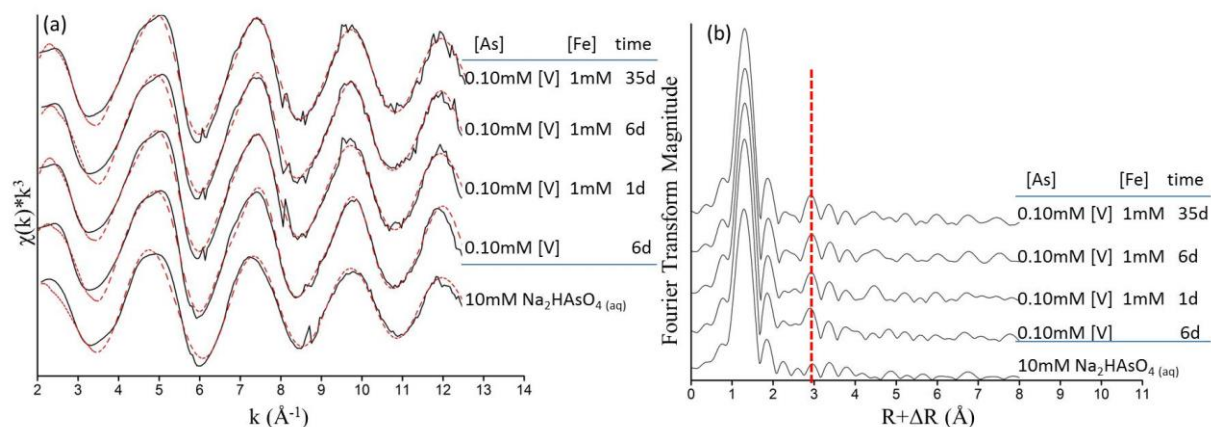

**Figure S5:** As  $K$ -edge EXAFS spectra of aqueous As(V) and 0.1mM As(V)/ $\gamma$ - $\text{Al}_2\text{O}_3$  sorption products in single-sorbate reaction and dual-sorbate reactions with 1mM Fe(II) addition: (a)  $k^3$ -weighted  $\chi$  spectra and (b) corresponding radial structure functions (RSFs). Solid and red dotted lines in panel (a) represent raw and fitted spectra, respectively. Red vertical dashed line in panel (b) indicates second-shell As-Al backscatters in the sorption samples.

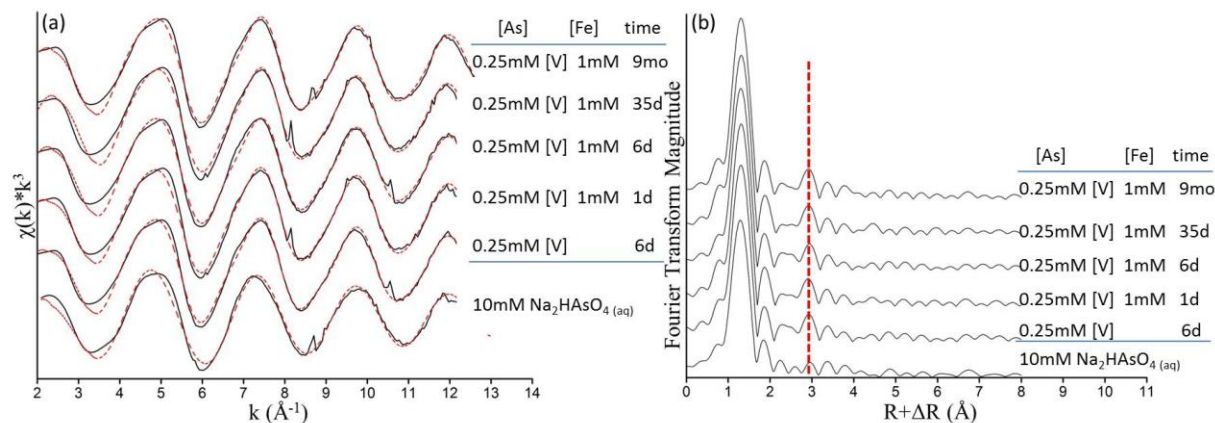

**Figure S6:** As  $K$ -edge EXAFS spectra of aqueous As(V) and 0.25mM As(V)/ $\gamma$ - $\text{Al}_2\text{O}_3$  sorption products in single-sorbate reaction and dual-sorbate reactions with 1mM Fe(II) addition: (a)  $k^3$ -weighted  $\chi$  spectra and (b) corresponding radial structure functions (RSFs). Solid and red dotted lines in panel (a) represent raw and fitted spectra, respectively. Red vertical dashed line in panel (b) indicates second-shell As-Al backscatters in the sorption samples.



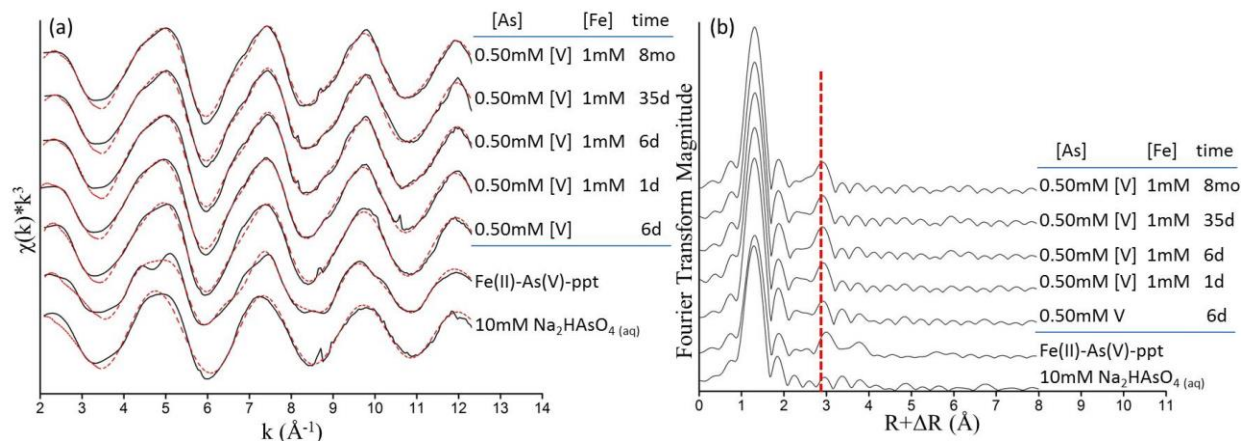

**Figure S7:** As  $K$ -edge EXAFS spectra of aqueous As(V) and 0.50mM As(V)/ $\gamma$ - $\text{Al}_2\text{O}_3$  sorption products in single-sorbate reaction and dual-sorbate reactions with 1mM Fe(II) addition: (a)  $k^3$ -weighted  $\chi$  spectra and (b) corresponding radial structure functions (RSFs). Solid and red dotted lines in panel (a) represent raw and fitted spectra, respectively. Red vertical dashed line in panel (b) indicates second-shell As-Al backscatters in the sorption samples.

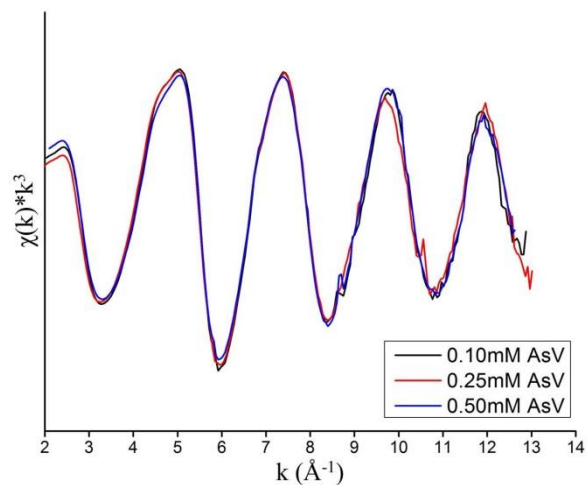

**Figure S8:** Comparison of the  $k^3$ -weighted  $\chi$  spectra of As(V) reacted  $\gamma$ - $\text{Al}_2\text{O}_3$  single-sorbate sorption samples with various As(V) concentration for a reaction time of 6 days.

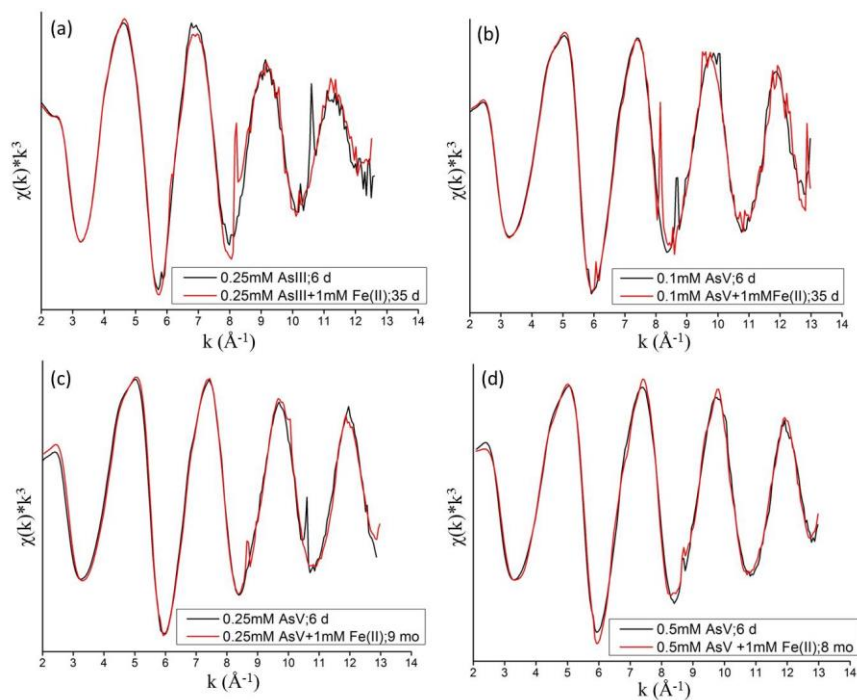

**Figure S9:** Comparison of the  $k^3$ -weighted As  $\chi$  spectra of As reacted  $\gamma$ -Al<sub>2</sub>O<sub>3</sub> single-sorbate and dual-sorbate sorption samples, with different As speciation and concentrations: (a) 0.25mM As(III); (b) 0.10mM As(V); (c) 0.25mM As(V); (d) 0.50mM As(V).

**Table S1. Fe K-edge EXAFS Fitting Results of Fe(II) Sorption and Reference Samples**

| sorption samples         |                   |      | $\Gamma^d$ | Fe-O            |                    |                                           | Fe-Fe |       |                              | Fe-Al |       |                              | Fe-As |       |                              |
|--------------------------|-------------------|------|------------|-----------------|--------------------|-------------------------------------------|-------|-------|------------------------------|-------|-------|------------------------------|-------|-------|------------------------------|
| [Fe] <sub>0</sub>        | [As] <sub>0</sub> | time |            | CN <sup>a</sup> | R (Å) <sup>b</sup> | $\sigma^2$ (Å <sup>2</sup> ) <sup>c</sup> | CN    | R (Å) | $\sigma^2$ (Å <sup>2</sup> ) | CN    | R (Å) | $\sigma^2$ (Å <sup>2</sup> ) | CN    | R (Å) | $\sigma^2$ (Å <sup>2</sup> ) |
| 1mM                      | 0.50mM V          | 8 mo | 1.96       | 5.8             | 2.10               | 0.010                                     |       |       |                              |       |       |                              |       |       |                              |
| 1mM                      | 0.50mM V          | 35 d | 2.36       | 5.3             | 2.09               | 0.010                                     |       |       |                              |       |       |                              |       |       |                              |
| 1mM                      | 0.50mM V          | 6 d  | 1.76       | 5.4             | 2.10               | 0.010                                     |       |       |                              |       |       |                              |       |       |                              |
| 1mM                      | 0.50mM V          | 1 d  | 1.70       | 6.0             | 2.09               | 0.012                                     |       |       |                              |       |       |                              |       |       |                              |
| 1mM                      | 0.25mM V          | 9 mo | 2.19       | 5.7             | 2.11               | 0.009                                     | 3.6   | 3.14  | 0.010                        | 2.9   | 3.14  | 0.010                        |       |       |                              |
| 1mM                      | 0.25mM V          | 35 d | 1.53       | 5.5             | 2.10               | 0.009                                     | 2.6   | 3.13  | 0.010                        | 2.3   | 3.13  | 0.010                        |       |       |                              |
| 1mM                      | 0.25mM V          | 6 d  | 0.95       | 5.0             | 2.09               | 0.009                                     |       |       |                              |       |       |                              |       |       |                              |
| 1mM                      | 0.25mM V          | 1 d  | 0.83       | 4.8             | 2.08               | 0.010                                     |       |       |                              |       |       |                              |       |       |                              |
| 1mM                      | 0.10mM V          | 35 d | 1.97       | 6.0             | 2.11               | 0.009                                     | 4.2   | 3.14  | 0.010                        | 2.9   | 3.14  | 0.010                        |       |       |                              |
| 1mM                      | 0.10mM V          | 6 d  | 1.33       | 5.2             | 2.11               | 0.009                                     | 3.0   | 3.15  | 0.010                        | 2.4   | 3.15  | 0.010                        |       |       |                              |
| 1mM                      | 0.10mM V          | 1 d  | 0.80       | 5.0             | 2.08               | 0.009                                     |       |       |                              |       |       |                              |       |       |                              |
| 1mM                      | 0.25mM III        | 6 d  | 1.81       | 6.0             | 2.11               | 0.008                                     | 4.0   | 3.14  | 0.009                        | 2.6   | 3.14  | 0.009                        |       |       |                              |
| 1mM                      | 0.25mM III        | 1 d  | 1.02       | 5.7             | 2.1                | 0.008                                     | 3.7   | 3.13  | 0.009                        | 2.8   | 3.13  | 0.009                        |       |       |                              |
| 1mM                      | —                 | 6 d  | 1.83       | 5.8             | 2.12               | 0.008                                     | 4.8   | 3.15  | 0.010                        | 2.0   | 3.15  | 0.010                        |       |       |                              |
| 1mM                      | —                 | 1 d  | 1.07       | 6.0             | 2.12               | 0.009                                     | 4.0   | 3.15  | 0.010                        | 2.3   | 3.15  | 0.010                        |       |       |                              |
| 1mM                      | —                 | 2 hr | 0.50       | 6.0             | 2.12               | 0.009                                     | 4.2   | 3.15  | 0.010                        | 2.4   | 3.15  | 0.010                        |       |       |                              |
| Fe references            |                   |      |            |                 |                    |                                           |       |       |                              |       |       |                              |       |       |                              |
| Nikischerite             |                   |      |            | 5.5             | 2.13               | 0.007                                     | 4.0   | 3.15  | 0.009                        | 2.3   | 3.15  | 0.009                        |       |       |                              |
| aqueous Fe <sup>2+</sup> |                   |      |            | 5.7             | 2.11               | 0.010                                     |       |       |                              |       |       |                              |       |       |                              |
| Fe(II)As(V)-precipitate  |                   |      |            | 5.4             | 2.11               | 0.008                                     | 0.9   | 3.25  | 0.015                        |       |       |                              | 3.5   | 3.45  | 0.015                        |

<sup>a</sup> CN is coordination number; <sup>b</sup> R is interatomic radial distance; <sup>c</sup>  $\sigma^2$  is Debye-Waller factor. Error estimates and details on fitting procedure are described above in section 1 above. <sup>d</sup>  $\Gamma$  is the Fe(II) sorption density ( $\mu\text{mol}/\text{m}^2$ ) calculated based on the N<sub>2</sub>-BET surface area.

**Table S2. As K-edge EXAFS Fitting Results of As Sorption and Reference Samples**

| sorption samples                              |                   |      | As-O           |                 |                    |                                               | As-Al |       |                                  | As-Fe |       |                                  |
|-----------------------------------------------|-------------------|------|----------------|-----------------|--------------------|-----------------------------------------------|-------|-------|----------------------------------|-------|-------|----------------------------------|
| [Fe] <sub>0</sub>                             | [As] <sub>0</sub> | time | Γ <sup>d</sup> | CN <sup>a</sup> | R (Å) <sup>b</sup> | σ <sup>2</sup> (Å <sup>2</sup> ) <sup>c</sup> | CN    | R (Å) | σ <sup>2</sup> (Å <sup>2</sup> ) | CN    | R (Å) | σ <sup>2</sup> (Å <sup>2</sup> ) |
| 1mM                                           | 0.50mM V          | 8 mo | 1.42           | 4.1             | 1.68               | 0.002                                         | 3.3   | 3.14  | 0.006                            |       |       |                                  |
| 1mM                                           | 0.50mM V          | 35 d | 1.42           | 4.1             | 1.69               | 0.002                                         | 3.2   | 3.15  | 0.006                            |       |       |                                  |
| 1mM                                           | 0.50mM V          | 6 d  | 1.41           | 4.2             | 1.69               | 0.002                                         | 3.2   | 3.14  | 0.006                            |       |       |                                  |
| 1mM                                           | 0.50mM V          | 1 d  | 1.39           | 4.3             | 1.69               | 0.002                                         | 2.7   | 3.14  | 0.006                            |       |       |                                  |
|                                               | 0.50mM V          | 6 d  | 1.04           | 4.1             | 1.68               | 0.002                                         | 2.6   | 3.12  | 0.006                            |       |       |                                  |
| 1mM                                           | 0.25mM V          | 9 mo | 0.71           | 4.4             | 1.68               | 0.002                                         | 2.8   | 3.14  | 0.006                            |       |       |                                  |
| 1mM                                           | 0.25mM V          | 35 d | 0.71           | 4.1             | 1.69               | 0.002                                         | 2.5   | 3.15  | 0.006                            |       |       |                                  |
| 1mM                                           | 0.25mM V          | 6 d  | 0.70           | 4.3             | 1.68               | 0.002                                         | 2.4   | 3.13  | 0.006                            |       |       |                                  |
| 1mM                                           | 0.25mM V          | 1 d  | 0.68           | 4.5             | 1.68               | 0.003                                         | 2.5   | 3.13  | 0.006                            |       |       |                                  |
|                                               | 0.25mM V          | 6 d  | 0.67           | 4.4             | 1.68               | 0.002                                         | 2.6   | 3.14  | 0.006                            |       |       |                                  |
| 1mM                                           | 0.10mM V          | 35 d | 0.28           | 4.3             | 1.68               | 0.002                                         | 2.5   | 3.15  | 0.006                            |       |       |                                  |
| 1mM                                           | 0.10mM V          | 6 d  | 0.28           | 4.1             | 1.68               | 0.002                                         | 2.4   | 3.15  | 0.006                            |       |       |                                  |
| 1mM                                           | 0.10mM V          | 1 d  | 0.28           | 4.2             | 1.68               | 0.002                                         | 2.5   | 3.15  | 0.006                            |       |       |                                  |
|                                               | 0.10mM V          | 6 d  | 0.26           | 4.2             | 1.68               | 0.002                                         | 2.7   | 3.13  | 0.006                            |       |       |                                  |
| 1mM                                           | 0.25mM III        | 35 d | 0.48           | 3.2             | 1.77               | 0.004                                         | 1.6   | 3.22  | 0.009                            |       |       |                                  |
| 1mM                                           | 0.25mM III        | 6 d  | 0.42           | 3.5             | 1.78               | 0.004                                         | 1.3   | 3.24  | 0.009                            |       |       |                                  |
| 1mM                                           | 0.25mM III        | 1 d  | 0.38           | 3.2             | 1.77               | 0.004                                         | 1.6   | 3.22  | 0.009                            |       |       |                                  |
|                                               | 0.25mM III        | 6 d  | 0.41           | 3.4             | 1.78               | 0.004                                         | 1.3   | 3.23  | 0.009                            |       |       |                                  |
| As references                                 |                   |      |                |                 |                    |                                               |       |       |                                  |       |       |                                  |
| 10mM Na <sub>2</sub> HAs(V)O <sub>4(aq)</sub> |                   |      |                | 4.2             | 1.68               | 0.003                                         |       |       |                                  |       |       |                                  |
| 10mM NaHAs(III)O <sub>2(aq)</sub>             |                   |      |                | 3.0             | 1.79               | 0.002                                         |       |       |                                  |       |       |                                  |
| Fe(II)-As(V)-precipitate                      |                   |      |                | 3.3             | 1.68               | 0.002                                         |       |       |                                  | 4.1   | 3.41  | 0.015                            |

<sup>a</sup> CN is coordination number; <sup>b</sup> R is interatomic radial distance; <sup>c</sup> σ<sup>2</sup> is Debye-Waller factor; <sup>d</sup> Γ is the As(III/V) sorption density (μmol/m<sup>2</sup>) calculated based on the N<sub>2</sub>-BET surface area.

## References

- (1) Ressler, T. WinXAS : a new software package not only for the analysis of energy-dispersive XAS data. *J. Phys. IV France* **1997**, 7, C2–C269.
- (2) Ankudinov, A. L.; Rehr, J. J. Relativistic calculations of spin-dependent x-ray-absorption spectra. *Phys. Rev. B* **1997**, 56, R1712–R1715.
- (3) Huminicki, D. M. C.; Hawthorne, F. C. The crystal structure of nikischerite,  $\text{NaFe}^{2+}_6\text{Al}_3(\text{SO}_4)_2(\text{OH})_{18}(\text{H}_2\text{O})_{12}$ , a mineral of the shigaite group. *Can. Mineral.* **2003**, 41, 79–82.
- (4) Kitahama, K.; Kiriya, R.; Baba, Y. Refinement of the Crystal Structure of Scorodite. *Acta Cryst.* **1975**, B31, 322–324.
- (5) Mikutta, C.; Frommer, J.; Voegelin, A.; Kaegi, R.; Kretzschmar, R. Effect of citrate on the local Fe coordination in ferrihydrite, arsenate binding, and ternary arsenate complex formation. *Geochim. Cosmochim. Acta* **2010**, 74, 5574–5592.
- (6) Voegelin, A.; Weber, F. A.; Kretzschmar, R. Distribution and speciation of arsenic around roots in a contaminated riparian floodplain soil: Micro-XRF element mapping and EXAFS spectroscopy. *Geochim. Cosmochim. Acta* **2007**, 71, 5804–5820.
- (7) Arai, Y.; Elzinga, E. J.; Sparks, D. L. X-ray absorption spectroscopic investigation of arsenite and arsenate adsorption at the aluminum oxide-water interface. *J. Colloid Interface Sci.* **2001**, 235, 80–88.
- (8) Elzinga, E. J. Formation of layered Fe(II)-Al(III)-hydroxides during reaction of Fe(II) with aluminum oxide. *Environ. Sci. Technol.* **2012**, 46, 4894–4901.
- (9) Scheidegger, A. M.; Lamble, G. M.; Sparks, D. L. Spectroscopic evidence for the formation of mixed-cation hydroxide phases upon metal sorption on clays and aluminum oxides. *J. Colloid Interface Sci.* **1997**, 186, 118–128.
- (10) Elzinga, E. J.; Sparks, D. L. Reaction condition effects on nickel sorption mechanisms in illite–water suspensions. *Soil Sci. Soc. Am. J.* **2001**, 65, 94–101.
- (11) Roberts, D. R.; Ford, R. G.; Sparks, D. L. Kinetics and mechanisms of Zn complexation on metal oxides using EXAFS spectroscopy. *J. Colloid Interface Sci.* **2003**, 263, 364–376.
- (12) Mori, H.; Ito, T. The structure of vivianite and symplectite. *Acta Cryst.* **1950**, 3, 1–6.
- (13) Parise, J. B.; Marshall, W. G.; Smith, R. I.; Lutz, H. D.; Möller, H. The nuclear and magnetic structure of “white rust”— $\text{Fe}(\text{OH}_{0.86}\text{D}_{0.14})_2$ . *Am. Mineral.* **2000**, 85, 189–193.
- (14) Alexandratos, V. G.; Elzinga, E. J.; Reeder, R. J. Arsenate uptake by calcite: macroscopic and spectroscopic characterization of adsorption and incorporation mechanisms. *Geochim. Cosmochim. Acta* **2007**, 71, 4172–4187.
- (15) Manning, B. A.; Fendorf, S. E.; Bostick, B.; Suarez, D. L. Arsenic(III) oxidation and arsenic(V) adsorption reactions on synthetic birnessite. *Environ. Sci. Technol.* **2002**, 36, 976–981.
- (16) Makris, K. C.; Sarkar, D.; Parsons, J. G.; Datta, R.; Gardea-Torresdey, J. L. X-ray absorption spectroscopy as a tool investigating arsenic(III) and arsenic(V) sorption by an aluminum-based drinking-water treatment residual. *J. Hazard. Mater.* **2009**, 171, 980–986.
- (17) Jönsson, J.; Sherman, D. M. Sorption of As(III) and As(V) to siderite, green rust (fougurite) and magnetite: implications for arsenic release in anoxic groundwaters. *Chem. Geol.* **2008**, 255, 173–181.
